# Supplementary material for: Tissue clearing of human iPSC-derived organ-chips enables high resolution imaging and analysis
Source: Royal Society of Chemistry journal article supplement (doi:10.1039/d2lc00116k), 2022-01-01
Supplement: d2lc00116k1.pdf [file d2lc00116k1.pdf]

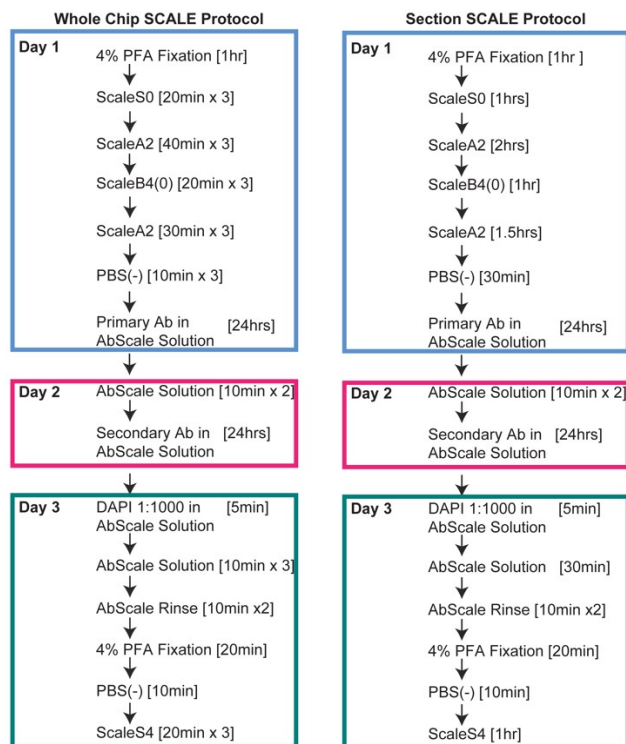

**Supplemental Figure 1:** Flow diagrams depicting the timing of whole chip SCALE and section SCALE.

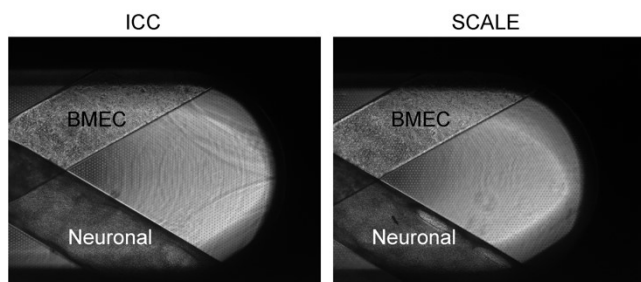

**Supplemental Figure 2:** Representative phase contrast imaging of d28 chips taken prior to staining or clearing applications. BMEC channel is shown at the top and neuronal channel is indicated at the bottom.
