# Supplementary material for: Tissue clearing of human iPSC-derived organ-chips enables high resolution imaging and analysis
Source: Royal Society of Chemistry journal article supplement (doi:10.1039/d2lc00116k), 2022-01-01

Supplementary Figure 1

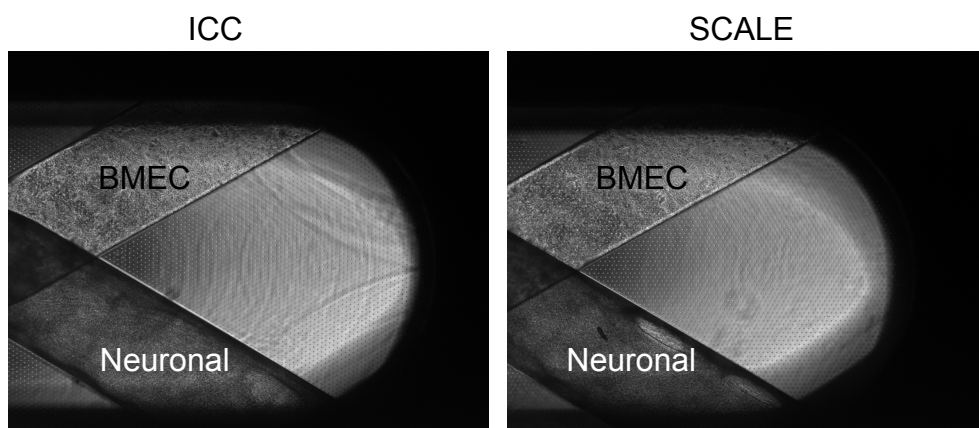

Supplement: d2lc00116k2.pdf [file d2lc00116k2.pdf]
